CORRECTION

# Correction: Safety of Seasonal Malaria Chemoprevention (SMC) with Sulfadoxine-Pyrimethamine plus Amodiaquine when Delivered to Children under 10 Years of Age by District Health Services in Senegal: Results from a Stepped-Wedge Cluster Randomized Trial

J. L. NDiaye, B. Cissé, E. H. Ba, J. F. Gomis, C. T. Ndour, J. F. Molez, F. B. Fall, C. Sokhna, B. Faye, E. Kouevijdin, F. K. Niane, M. Cairns, J. F. Trape, C. Rogier, O. Gaye, B. M. Greenwood, P. J. M. Milligan

The following information is missing from the Funding section: MC received support through a Population Health Scientist Fellowship jointly funded by the UK Medical Research Council (MRC) and the UK Department for International Development (DFID). JLN is supported by a Wellcome Trust Intermediate Fellowship in Public Health and Tropical Medicine.

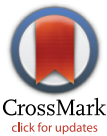

## Reference

1. NDiaye JL, Cissé B, Ba EH, Gomis JF, Ndour CT, Molez JF, et al. (2016) Safety of Seasonal Malaria Chemoprevention (SMC) with Sulfadoxine-Pyrimethamine plus Amodiaquine when Delivered to Children under 10 Years of Age by District Health Services in Senegal: Results from a Stepped-Wedge Cluster Randomized Trial. PLoS ONE 11(10): e0162563. doi: [10.1371/journal.pone.0162563](https://doi.org/10.1371/journal.pone.0162563) PMID: [27764102](https://pubmed.ncbi.nlm.nih.gov/27764102/)

## OPEN ACCESS

**Citation:** NDiaye JL, Cissé B, Ba EH, Gomis JF, Ndour CT, Molez JF, et al. (2016) Correction: Safety of Seasonal Malaria Chemoprevention (SMC) with Sulfadoxine-Pyrimethamine plus Amodiaquine when Delivered to Children under 10 Years of Age by District Health Services in Senegal: Results from a Stepped-Wedge Cluster Randomized Trial. PLoS ONE 11(12): e0168421. doi:10.1371/journal.pone.0168421

**Published:** December 8, 2016

**Copyright:** © 2016 NDiaye et al. This is an open access article distributed under the terms of the [Creative Commons Attribution License](https://creativecommons.org/licenses/by/4.0/), which permits unrestricted use, distribution, and reproduction in any medium, provided the original author and source are credited.
